# Supplementary material for: Retroperitoneal fasciae as barriers for nerve and arterial passages connecting the retroperitoneal region to the peritoneal organs
Source: PubMed Central journal article supplement (PMC11161817; doi:10.1111/joa.14036), 2024-03-07
Supplement: JOA-245-1-s001.pdf [file JOA-245-1-s001.pdf]

この領域を表示するためには、Adobe Readerなどの3D PDF対応ビューワーが必要です。
